# Supplementary material for: The Design of Anionic Surfactant-Based Amino-Functionalized Mesoporous Silica Nanoparticles and their Application in Transdermal Drug Delivery
Source: PubMed Central journal article supplement (PMC7693828; doi:10.3390/pharmaceutics12111035), 2020-10-29
Supplement: pharmaceutics-12-01035-s001.pdf [file pharmaceutics-12-01035-s001.pdf]

# Supplementary Materials: The Design of Anionic Surfactant Based Amino-Functionalized Mesoporous Silica Nanoparticles and their Application in Transdermal Drug Delivery

Aliyah A. Almomen , Ahmed M. El-Toni , Mohammed Badran , Adel Alhowyan , Mohd Abul Kalam , Aws Alshamsan and Musaed Alkholief

**Table S1.** Molar ratio of APTES with respect to other reaction components.

| Surfactant | HCl   | APTES (vol( $\mu$ l)) | TEOS | Water   | Ethanol |
|------------|-------|-----------------------|------|---------|---------|
| 0.130      | 0.013 | 0.027 (50)            | 1    | 217.777 | 6.705   |
| 0.130      | 0.013 | 0.041 (75)            | 1    | 217.777 | 6.705   |
| 0.130      | 0.013 | 0.055 (100)           | 1    | 217.777 | 6.705   |
| 0.130      | 0.013 | 0.083 (150)           | 1    | 217.777 | 6.705   |

## Physicochemical characteristics of 5-FU/DEX MSN-NH<sub>2</sub> gels

All MSN-NH<sub>2</sub> gels were investigated by performing their homogeneity using visual inspection to check the prepared gels was homogenous and presence or absence of aggregates. Furthermore, the pH of the formulations was determined using a Mettler Toledo Seven Compact pH meter (Billerica, MA) after dipping directly into the gel product and allowing it to equilibrate for one minute. The viscosity of MSN-NH<sub>2</sub> gel in comparison with MSN-NH<sub>2</sub> suspension was determined at 25 °C without dilution using Brookfield viscometer model DV-II with a large sample adaptor connected to Brookfield temperature controller TC-202. (Brookfield Engineering Laboratories, MA, USA) using spindle no. 4S at 4.0 rpm.

## Results and discussion

The carbopol 934 gel was selected as hydrogel according to the previously work, which provides good flow properties of NPs for topical and transdermal administration (2). Moreover, 1% w/v of a carbopol gel was prepared and showed proper consistency and a clear appearance (3). MSN-NH<sub>2</sub> were added into the carbopol gel and stirred for 24 h to mix uniformly without any aggregation. All formulated gels were described for their cosmetic characters (color, texture and consistency). The gels were light yellowish in color with a smooth homogeneous appearance and texture. The pH value of the formulations ranged from 6.1 to 6.9, which evades the tendency of irritation upon application to the skin (4). The MSN-NH<sub>2</sub> suspensions have low viscosity and, therefore, their skin application may be inconvenient. Therefore, carbopol 934 gel was used to increase the viscosity of the NPs for this issue (5). The viscosity of, 5-FU MSN-NH<sub>2</sub>-gel, DEX MSN-NH<sub>2</sub> gel and 5-FU/DEX MSN-NH<sub>2</sub> gel were 15520, 17286, and 23151 cP. Therefore, the hydrogels can be applied with MSN-NH<sub>2</sub> with good performance and sustained release of the drug. This gel significantly promotes good adhesion, spreading and viability of encapsulated 5-FU and DEX to the skin.

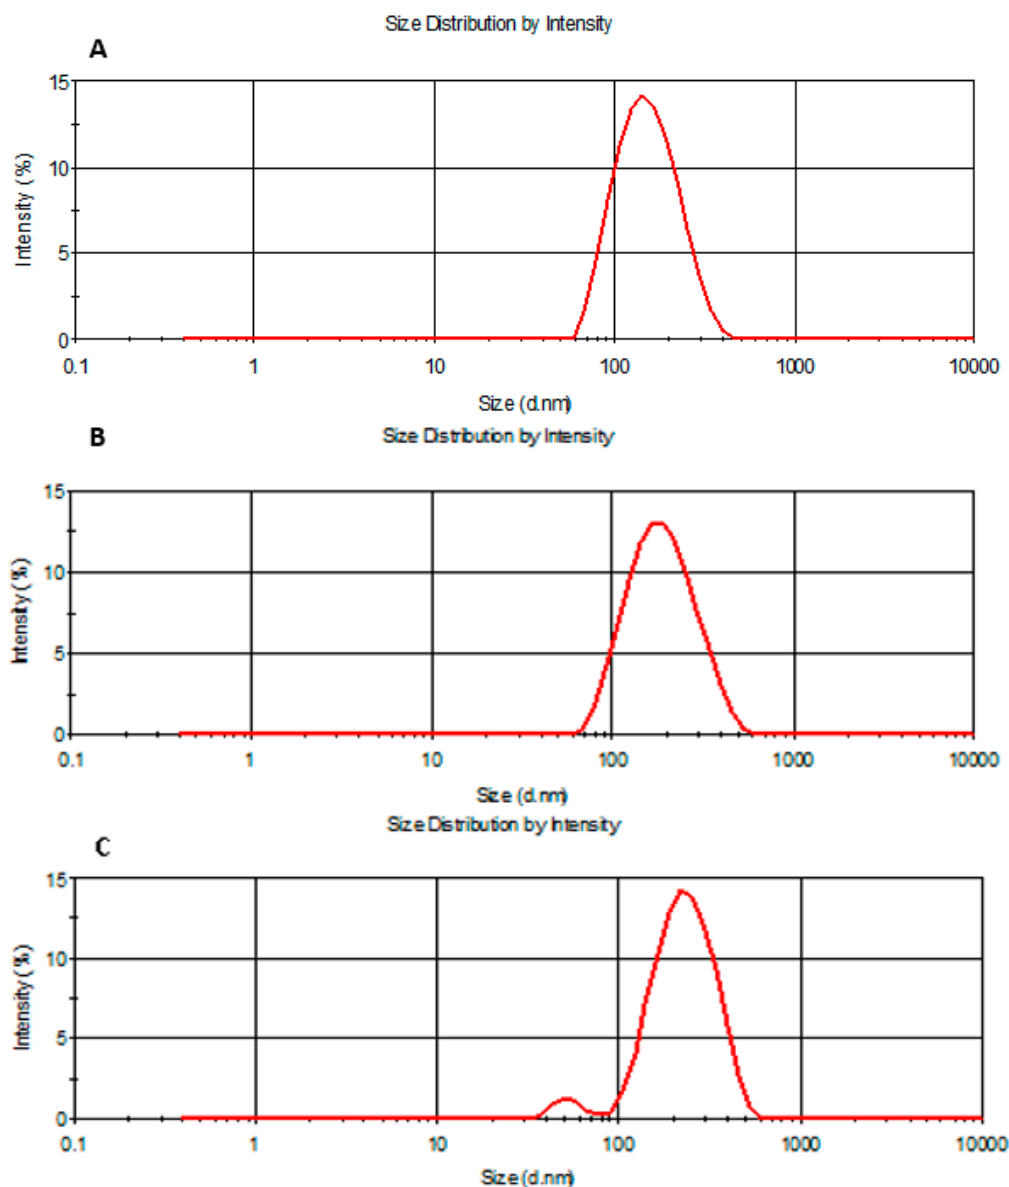

**Figure S1.** Intensity particle size distribution obtained for plain MSN-NH<sub>2</sub> (A) DEX MSN-NH<sub>2</sub> (B) and 5-FU MSN-NH<sub>2</sub> (C).

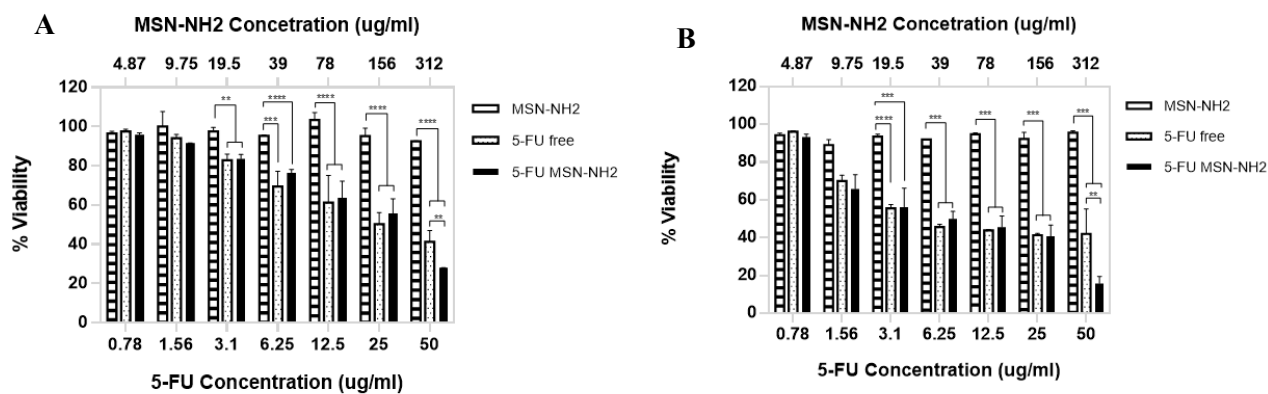

**Figure S2.** Cytotoxicity of HT-144 cells after the treatment with MSN-NH<sub>2</sub>, 5-FU free, and 5-FU MSN-NH<sub>2</sub> for (A) 24 h, and (B) 48 h. Data are represented as mean  $\pm$  SD ( $n = 3$ ).

A

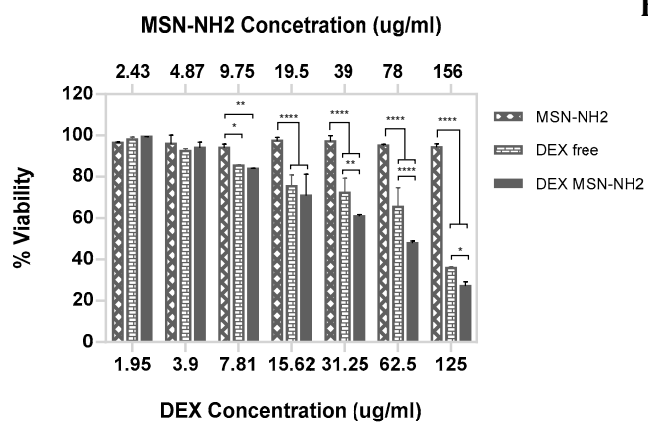

B

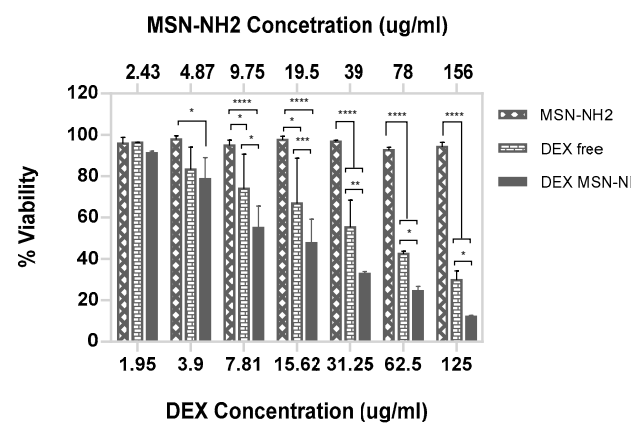

**Figure S3.** Cytotoxicity of HT-144 cells after the treatment with MSN-NH<sub>2</sub>, DEX free, and DEX MSN-NH<sub>2</sub> for (A) 24 h, and (B) 48 h. Data are represented as mean  $\pm$  SD ( $n = 3$ ).
